# Supplementary material for: Effects of Chicken Serum Metabolite Treatment on the Blood Glucose Control and Inflammatory Response in Streptozotocin-Induced Type 2 Diabetes Mellitus Rats
Source: Int J Mol Sci. 2022 Dec 28;24(1):523. doi: 10.3390/ijms24010523 (PMC9820086; doi:10.3390/ijms24010523)
Supplement: Supplementary file 1 [file ijms-24-00523-s001.zip › ijms-1995731-supplementary.pdf]

## Supporting Information

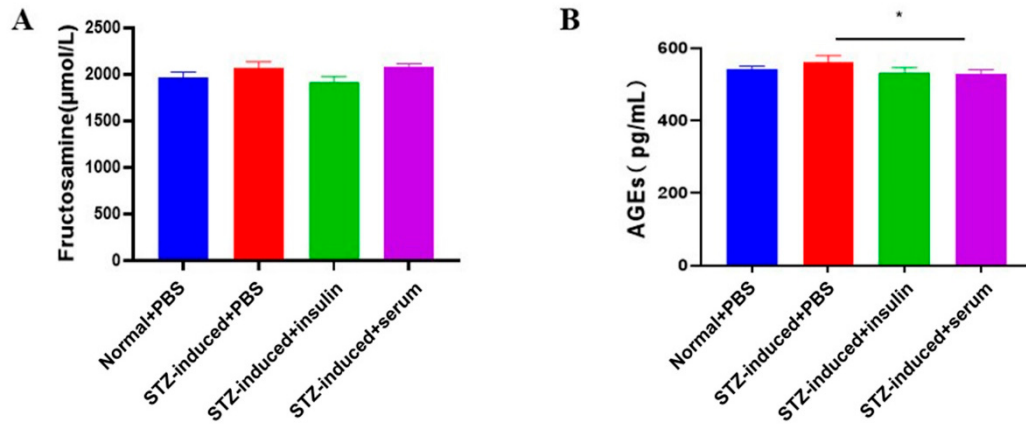

**Figure S1** Effect of chicken serum on fructosamine and AGE levels in rat serum. **(A)** Individual fructosamine levels in four groups (Normal + PBS, STZ-induced + PBS, STZ-induced + insulin, STZ-induced + serum) were evaluated by ELISA. **(B)** Individual AGEs levels in four groups (Normal + PBS, STZ-induced + PBS, STZ-induced + insulin, STZ-induced + serum) were evaluated by ELISA. All values of a, b are mean  $\pm$  SE  $n=6$  rats per group, with  $*P < 0.05$  determined by one-way ANOVA.

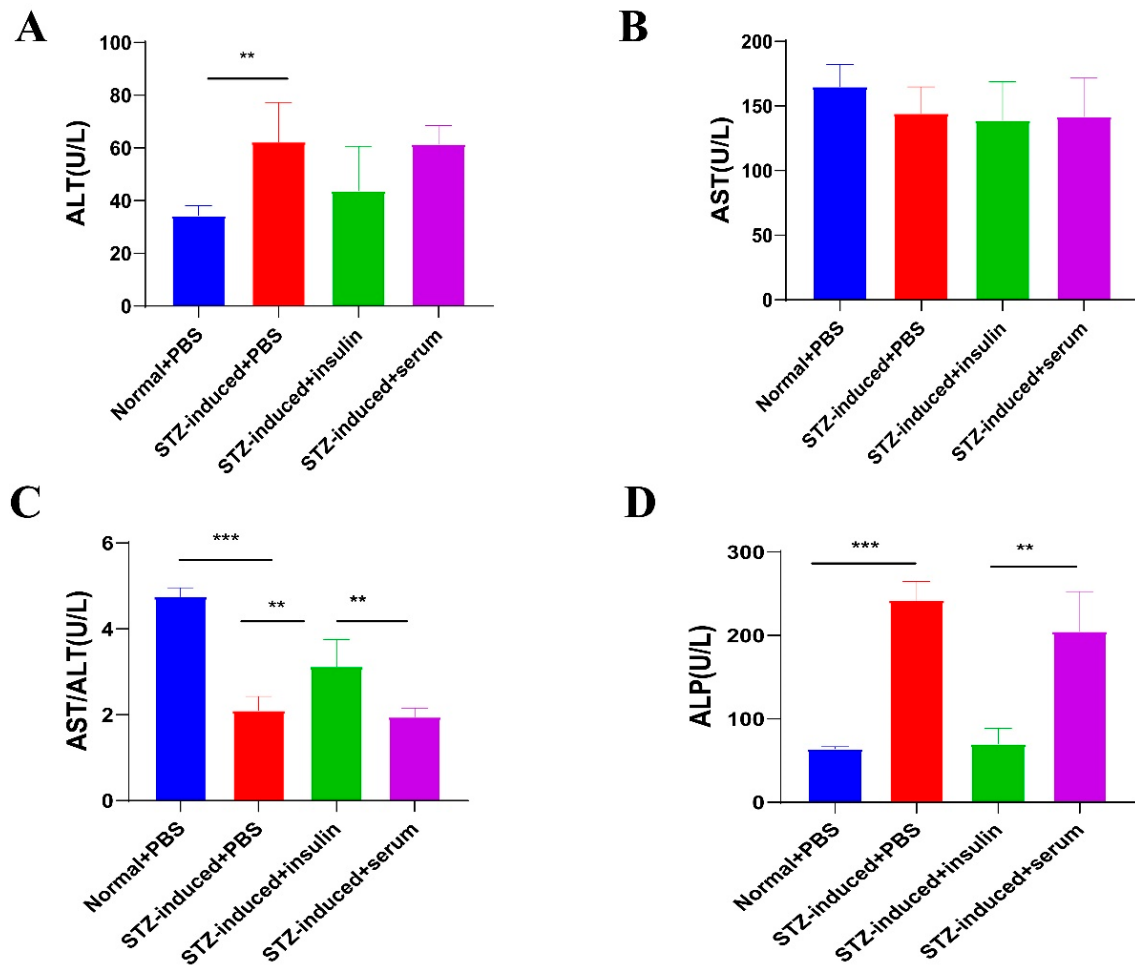

**Figure S2.** Effect of chicken serum on biochemical detection in rat serum. (A) Individual alanine transferase levels in four groups (Normal + PBS, STZ-induced + PBS, STZ-induced + insulin, STZ-induced + serum) were evaluated by serum biochemical examination. (B) Individual aspartate aminotransferase levels in four groups (Normal + PBS, STZ-induced + PBS, STZ-induced + insulin, STZ-induced + serum) were evaluated by serum biochemical examination. (C) Individual aspartate/aspartate alanine levels in four groups (Normal + PBS, STZ-induced + PBS, STZ-induced + insulin, STZ-induced + serum) were evaluated by serum biochemical examination. (D) Individual alkaline phosphatase levels in four groups (Normal + PBS, STZ-induced + PBS, STZ-induced + insulin, STZ-induced + serum) were evaluated by serum biochemical examination. All values of a-d are mean  $\pm$  SE  $n=6$  rats per group, with  $**P < 0.01$ ,  $***P < 0.001$  determined by one-way ANOVA.





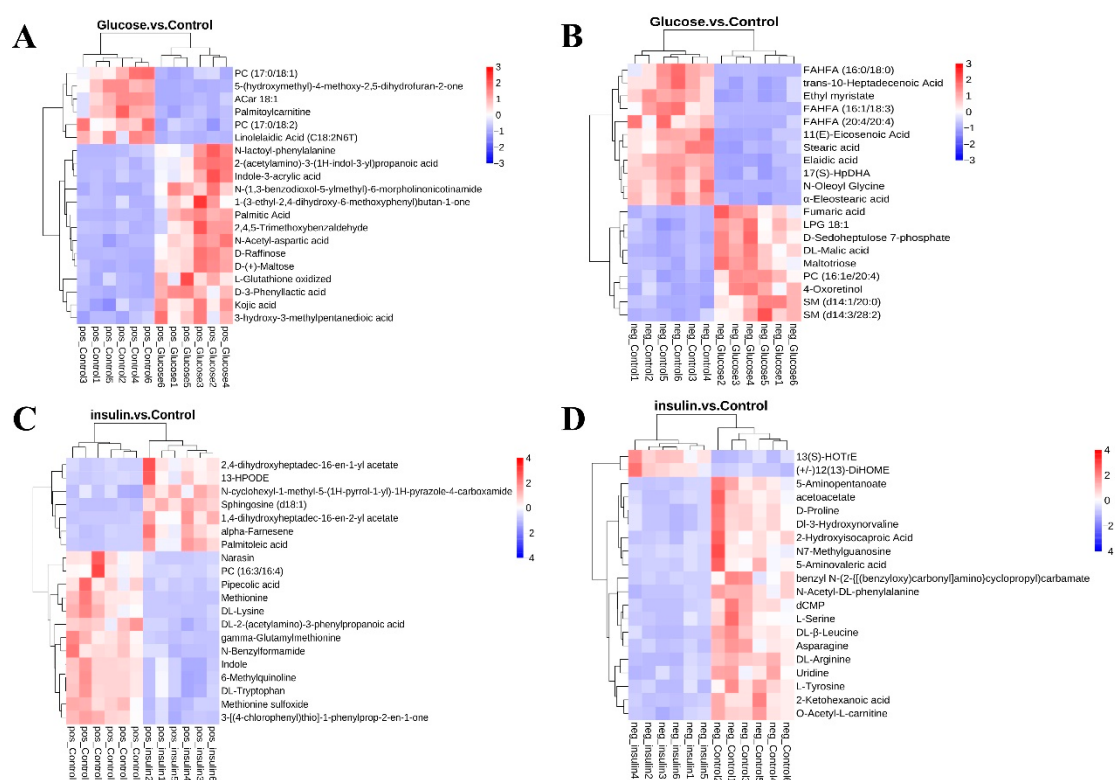

**Figure S6.** Heat map of differential metabolite clusters in acute hyperglycemic/hypoglycemic chickens and control birds. **(A)** Acute hyperglycemic chickens and control birds positive ion mode. **(B)** Acute hyperglycemic chickens and control birds negative ion mode. **(C)** Acute hypoglycemic chickens and control birds positive ion mode. **(D)** Acute hypoglycemic chickens and control birds negative ion mode. The horizontal rows in the figure represent the samples of each group, the vertical columns represent the differential metabolites, the red represents the up-regulated expression of the differential metabolites, and the blue represents the down-regulated expression of the differential metabolites. The darker the color, the more obvious the difference.

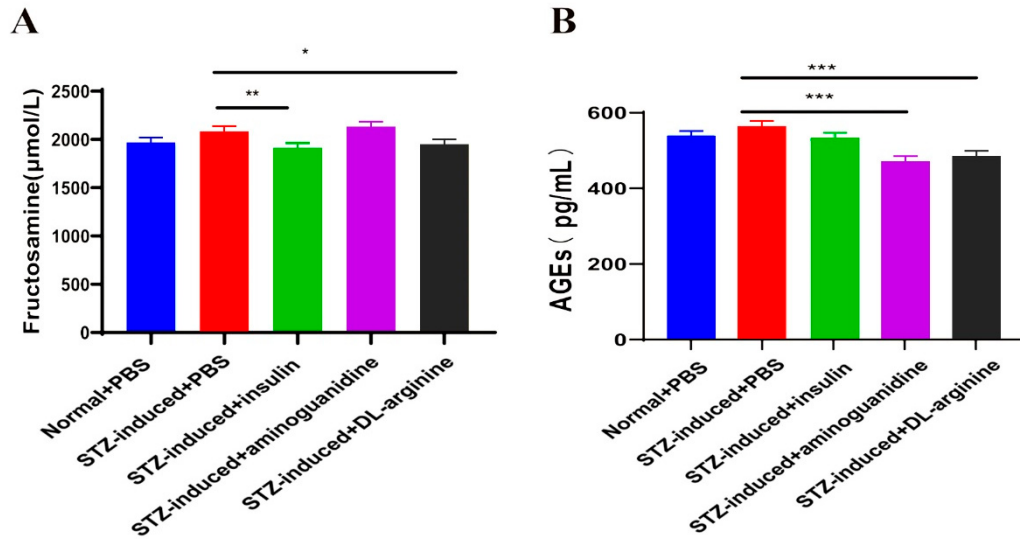

**Figure S7.** Effect of DL- arginine on fructosamine and AGEs levels in rat serum. **(A)** Individual fructosamine levels in five groups (Normal + PBS, STZ-induced + PBS, STZ-induced + insulin, STZ-induced + aminoguanidine, STZ-induced +DL-arginine) were evaluated by ELISA. **(B)** Individual AGEs levels in five groups (Normal + PBS, STZ-induced + PBS, STZ-induced + insulin, STZ-induced + aminoguanidine, STZ-induced +DL-arginine) were evaluated by ELISA. All values of a,b are mean  $\pm$  SE  $n=6$  rats per group, with  $*P < 0.05$ ,  $**P < 0.01$ ,  $***P < 0.001$  determined by one-way ANOVA.

**Table S1.** Rat standard diet composition.

| Ingredient          | gm% | Protein, % | Subtotal | Fat, % | Subtotal | Fiber, % | Subtotal | Ash, % | Subtotal | Calcium, % | Subtotal | Phosphorus, % | Subtotal |
|---------------------|-----|------------|----------|--------|----------|----------|----------|--------|----------|------------|----------|---------------|----------|
| Basic diet          | 1   | 18.27      | 18.27    | 4.8    | 4.8      | 3.57     | 3.57     | 5.89   | 5.89     | 1.22       | 1.22     | 0.839         | 0.839    |
| Total               | 1   |            | 18.27    |        | 4.8      |          | 3.57     |        | 5.89     |            | 1.22     |               | 0.839    |
| Energetic substance |     |            |          |        |          |          |          |        |          |            | gm, %    | Kcal/kg       | Kcal, %  |
| Protein             |     |            |          |        |          |          |          |        |          |            | 18.27    | 730.8         | 21.11%   |
| Fat                 |     |            |          |        |          |          |          |        |          |            | 4.8      | 432           | 12.48%   |
| Carbohydrate        |     |            |          |        |          |          |          |        |          |            | 57.47    | 2298.8        | 66.41%   |
| Total energy        |     |            |          |        |          |          |          |        |          |            |          | 3461.6        | 100.00%  |

**Table S2.** Rat 45% high-fat diet (HFD) composition.

| Ingredient                 | gm%   | Protein,% | Subtotal | Fat,% | Subtotal | Fiber,% | Subtotal | Ash,% | Subtotal | Calcium,% | Subtotal | Phosphorus,% | Subtotal |
|----------------------------|-------|-----------|----------|-------|----------|---------|----------|-------|----------|-----------|----------|--------------|----------|
| Basic diet                 | 0.435 | 19        | 8.265    | 5     | 2.175    | 3       | 1.305    | 5.5   | 2.3925   | 1         | 0.435    | 0.78         | 0.3393   |
| Lard                       | 0.175 | 0         | 0        | 98    | 17.15    | 0       | 0        | 0     | 0        | 0         | 0        | 0            | 0        |
| Sucrose                    | 0.12  | 0         | 0        | 0     | 0        | 0       | 0        | 0.5   | 0.06     | 0.04      | 0.0048   | 0.01         | 0.0012   |
| Whole milk powder          | 0.1   | 40        | 4        | 48    | 4.8      | 0       | 0        | 0     | 0        | 0         | 0        | 0            | 0        |
| Casein                     | 0.13  | 90        | 11.7     | 0     | 0        | 0       | 0        | 0     | 0        | 0         | 0        | 0            | 0        |
| Mineral/Vitamin Mix        | 0.02  | 22        | 0.44     | 1.4   | 0.028    | 0.8     | 0.016    | 25    | 0.5      | 7.18      | 0.1436   | 5.25         | 0.105    |
| Calcium hydrogen phosphate | 0.02  | 0         | 0        | 0     | 0        | 0       | 0        | 78.48 | 1.5696   | 22        | 0.44     | 17           | 0.34     |
| Total                      | 1     |           | 24.405   |       | 24.153   |         | 1.321    |       | 4.5221   |           | 1.0234   |              | 0.7855   |
| Energetic substance        |       |           |          |       |          |         |          |       |          |           | gm,%     | Kcal/kg      | Kcal,%   |
| Protein                    |       |           |          |       |          |         |          |       |          |           | 24.41    | 976.2        | 21.34%   |
| Fat                        |       |           |          |       |          |         |          |       |          |           | 24.15    | 2173.77      | 47.53%   |
| Carbohydrate               |       |           |          |       |          |         |          |       |          |           | 35.6     | 1423.96      | 31.13%   |
| Total energy               |       |           |          |       |          |         |          |       |          |           |          | 4573.926     | 100.00%  |

**TableS3.**Chicken diet composition.

| Ingredient (%)                      |       | Calculated Nutrient      |           |
|-------------------------------------|-------|--------------------------|-----------|
| Corn (%)                            | 58.04 | Granulometry (μ)         | 1,362.54  |
| Soya (%)                            | 10    | Crude protein (%)        | 21        |
| Soybean cake granule (%)            | 13.1  | AMEn poultry (kcal/kg)   | 2,989.03  |
| Dresses distillery (%)              | 5     | Phosphorus available (%) | 0.5       |
| Corn gluten (%)                     | 4.6   | Total chloride (%)       | 0.21      |
| Canola oil cake (%)                 | 4.8   | Total sodium (%)         | 0.22      |
| Limestone (%)                       | 1.53  | Choline added (mg/kg)    | 396.99    |
| Monocalcium phosphate (%)           | 1.25  | Vit.A added (IU/kg)      | 11,000.00 |
| Soybean oil (%)                     | -     | Vit.D added (IU/kg)      | 4,988.24  |
| Lysine sulfate 70% (%)              | 0.43  | Vit.E added (IU/kg)      | 80        |
| Sodium bicarbonate (%)              | 0.36  | Arg Dig V Vol (%)        | 1.16      |
| Salt (%)                            | 0.25  | SID Lys (%)              | 1.08      |
| Luzern concentrate (%)              | 0.2   | SID Met and Cys (%)      | 0.8       |
| Methionine (%)                      | 0.18  | SID Met (%)              | 0.49      |
| Myco-curb liquid (%)                | 0.1   | SID Thr (%)              | 0.67      |
| Choline liquid 75% (%)              | 0.06  | SID Try (%)              | 0.21      |
| Hy D premix (Vitamin D3) (%)        | 0.03  | Calcium (%)              | 1         |
| Threonine 98% (%)                   | -     |                          |           |
| OptiPhos 1000ct 250 ftu (0.12%) (%) | 0.03  |                          |           |
| Vitamin E 100,000 IU (%)            | 0.05  |                          |           |

**Table S4.** Sequences of real-time PCR primers.

| Primer<br>name | primer sequence 5'→3'    | Annealing<br>temperature °C |
|----------------|--------------------------|-----------------------------|
| β-actin-F      | GACCTGTACGCCAACACAGT     | 60°C                        |
| β-actin-R      | CTCAGGAGGAGCAATGATCT     |                             |
| CS-F           | GGAGCCAAGAACTCATC        | 60°C                        |
| CS-R           | CCACCGTACATCATGTC        |                             |
| GCK-F          | CCACAATCATGCCGACCTCA     | 60°C                        |
| GCK-R          | ATGCAGCACCTGATAGC        |                             |
| PKM-F          | ATGCAGCACCTGATAGC        | 60°C                        |
| PKM-R          | TGCGTGTCACAGCAATG        |                             |
| ICDH-F         | GTGTATAACTTCCCTGCCGGA    | 60°C                        |
| ICDH-R         | AGCGGCCATTTCTTCTGGAT     |                             |
| GLUT2 F        | CACCAGCACATACGACACCAGAC  | 60°C                        |
| GLUT2 R        | CCCAAGCCACCCACCAAAGAAC   |                             |
| GLUT4-F        | GTGCCTATGTATGTGGGAGAA    | 60°C                        |
| GLUT4-R        | TGCAGGAGAGCAGGGAGTA      |                             |
| RAGE-F         | CACGAGGATGAGGGCACCTA     | 60°C                        |
| RAGE-R         | CCTCATCGCCGGTTTCTGTGA    |                             |
| AGER1-F        | CTGCCTCTGAACTCACAGCCAATG | 60°C                        |
| AGER1-R        | TCCTGGTCTCCTCCTTCACAACTG |                             |
| MAPK-F         | CTACTGGGCTCCAAGCCAAA     | 60°C                        |
| MAPK-R         | CTAAAACCTCTGCAGCGCGTC    |                             |
| NF-κB-F        | TGTGGTGGAGGACTTGCTGAGG   | 60°C                        |
| NF-κB-R        | AGTGCTGCCTTGCTGTTCTTGAG  |                             |
